# Supplementary material for: Genetic basis of thermal nociceptive sensitivity and brain weight in a BALB/c reduced complexity cross
Source: PubMed Central journal article supplement — Mol Pain. 2022 Feb 28;18:17448069221079540. doi: 10.1177/17448069221079540 (PMC8891926; doi:10.1177/17448069221079540), 2022-02-28

# Genetic basis of thermal nociceptive sensitivity and brain weight in a BALB/c reduced complexity cross

Figures for the paper

# Supplementary Figure 1: Parental strain hot plate latencies and brain weights by prior treatment

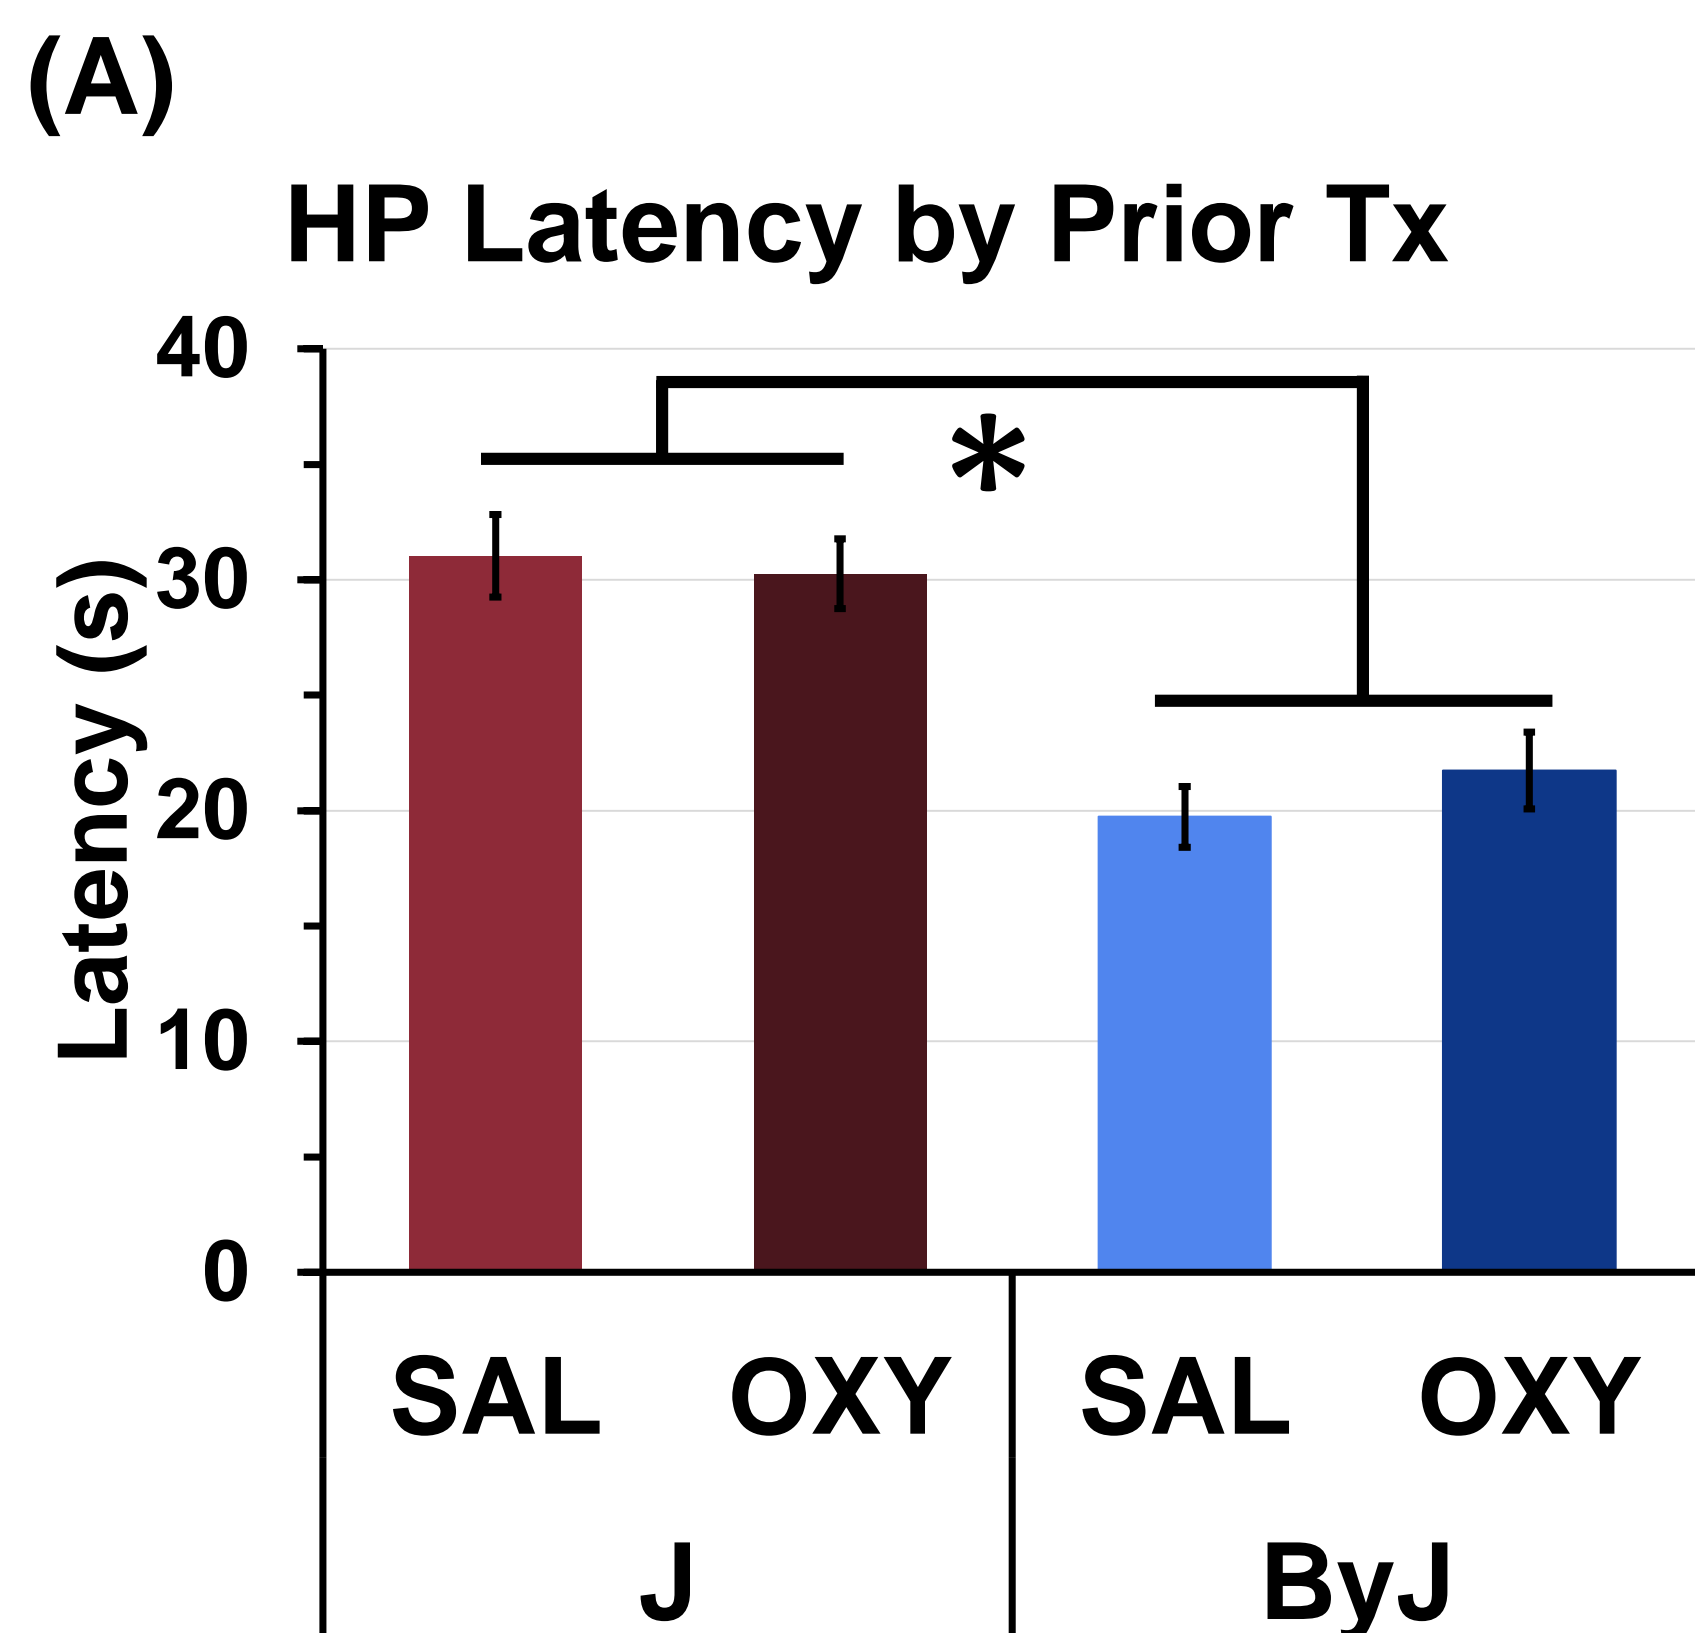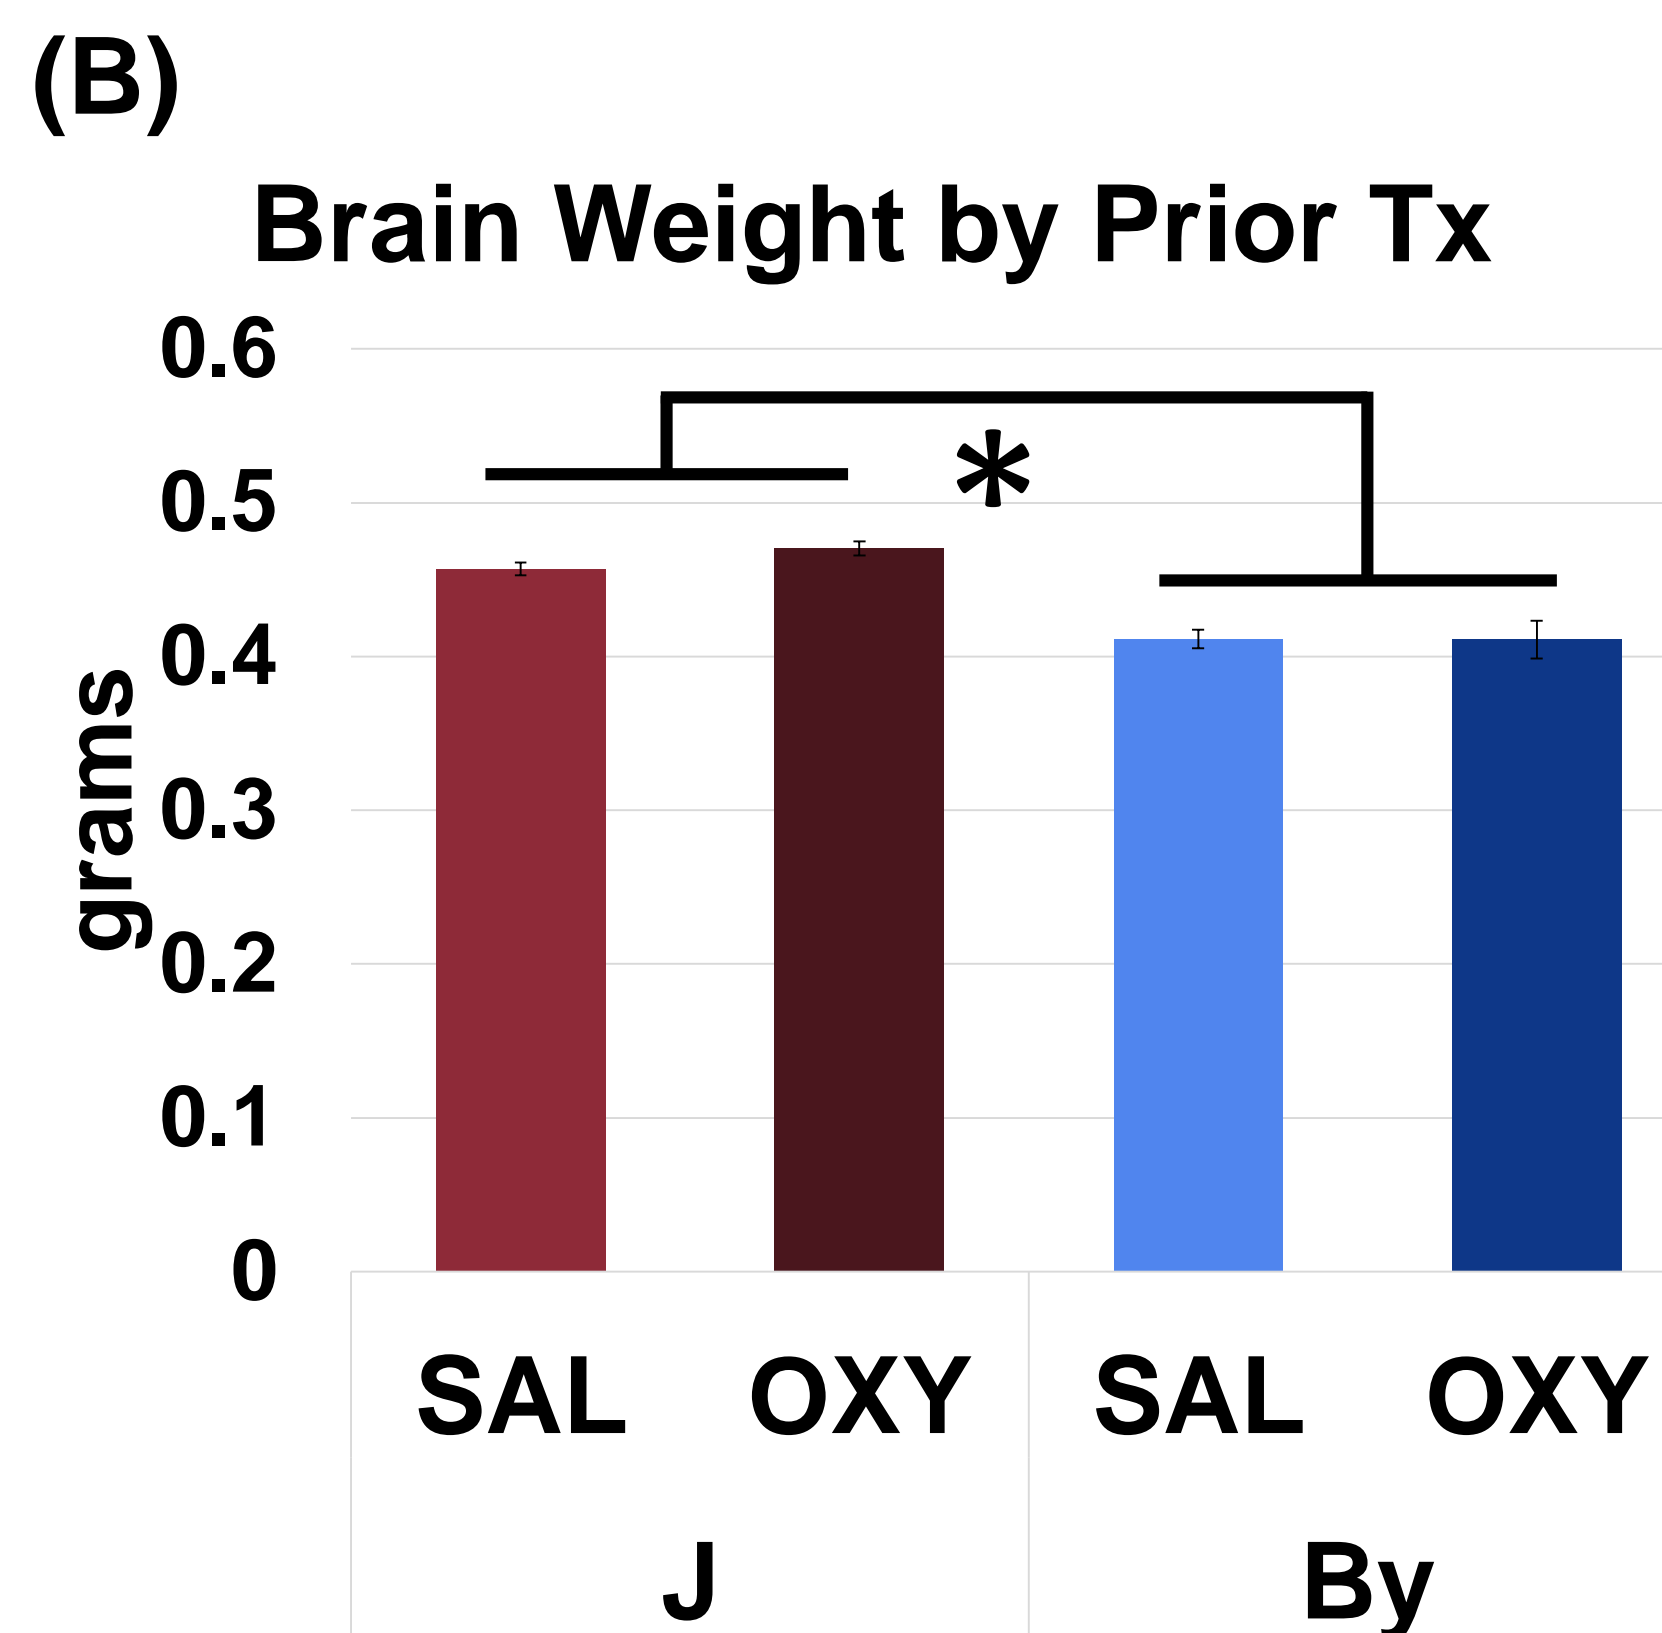

# Supplementary Figure 2: Saline-only QTLs for raw and normalized hot plate latencies

(A)

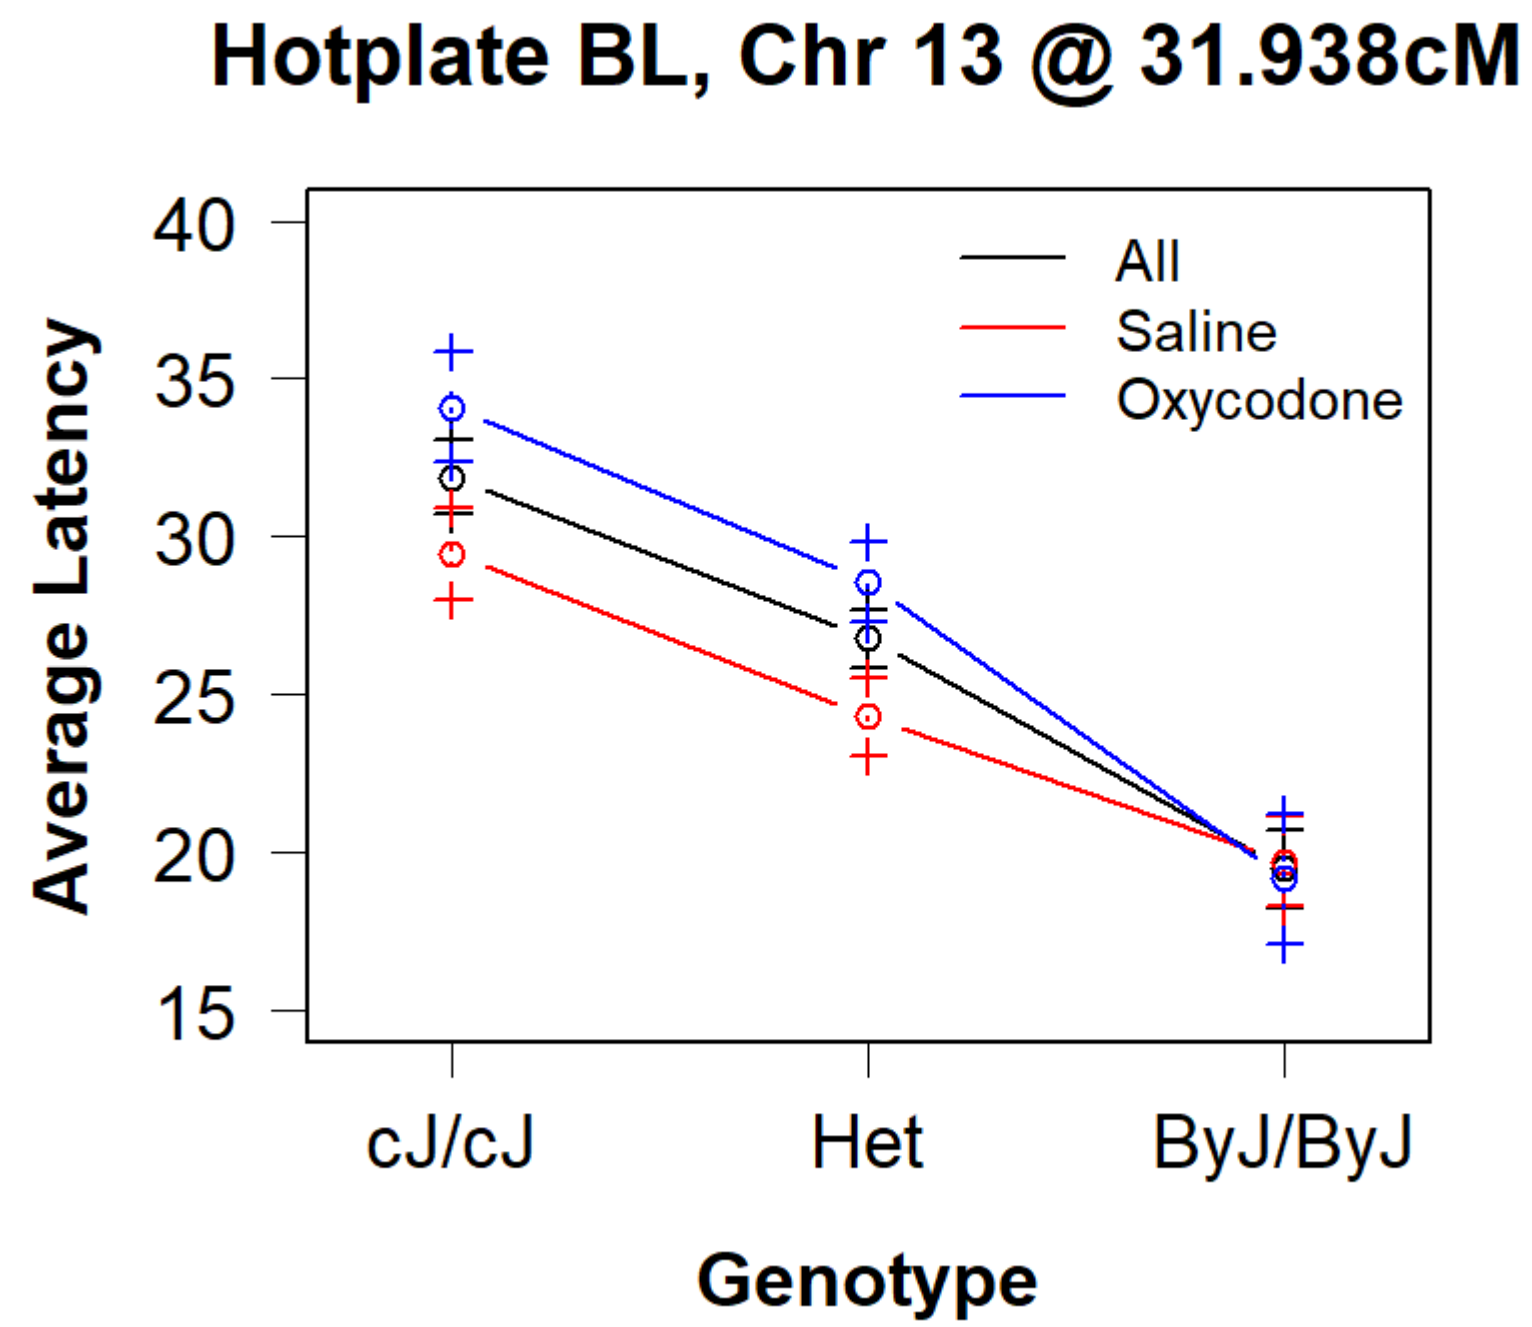

(B)

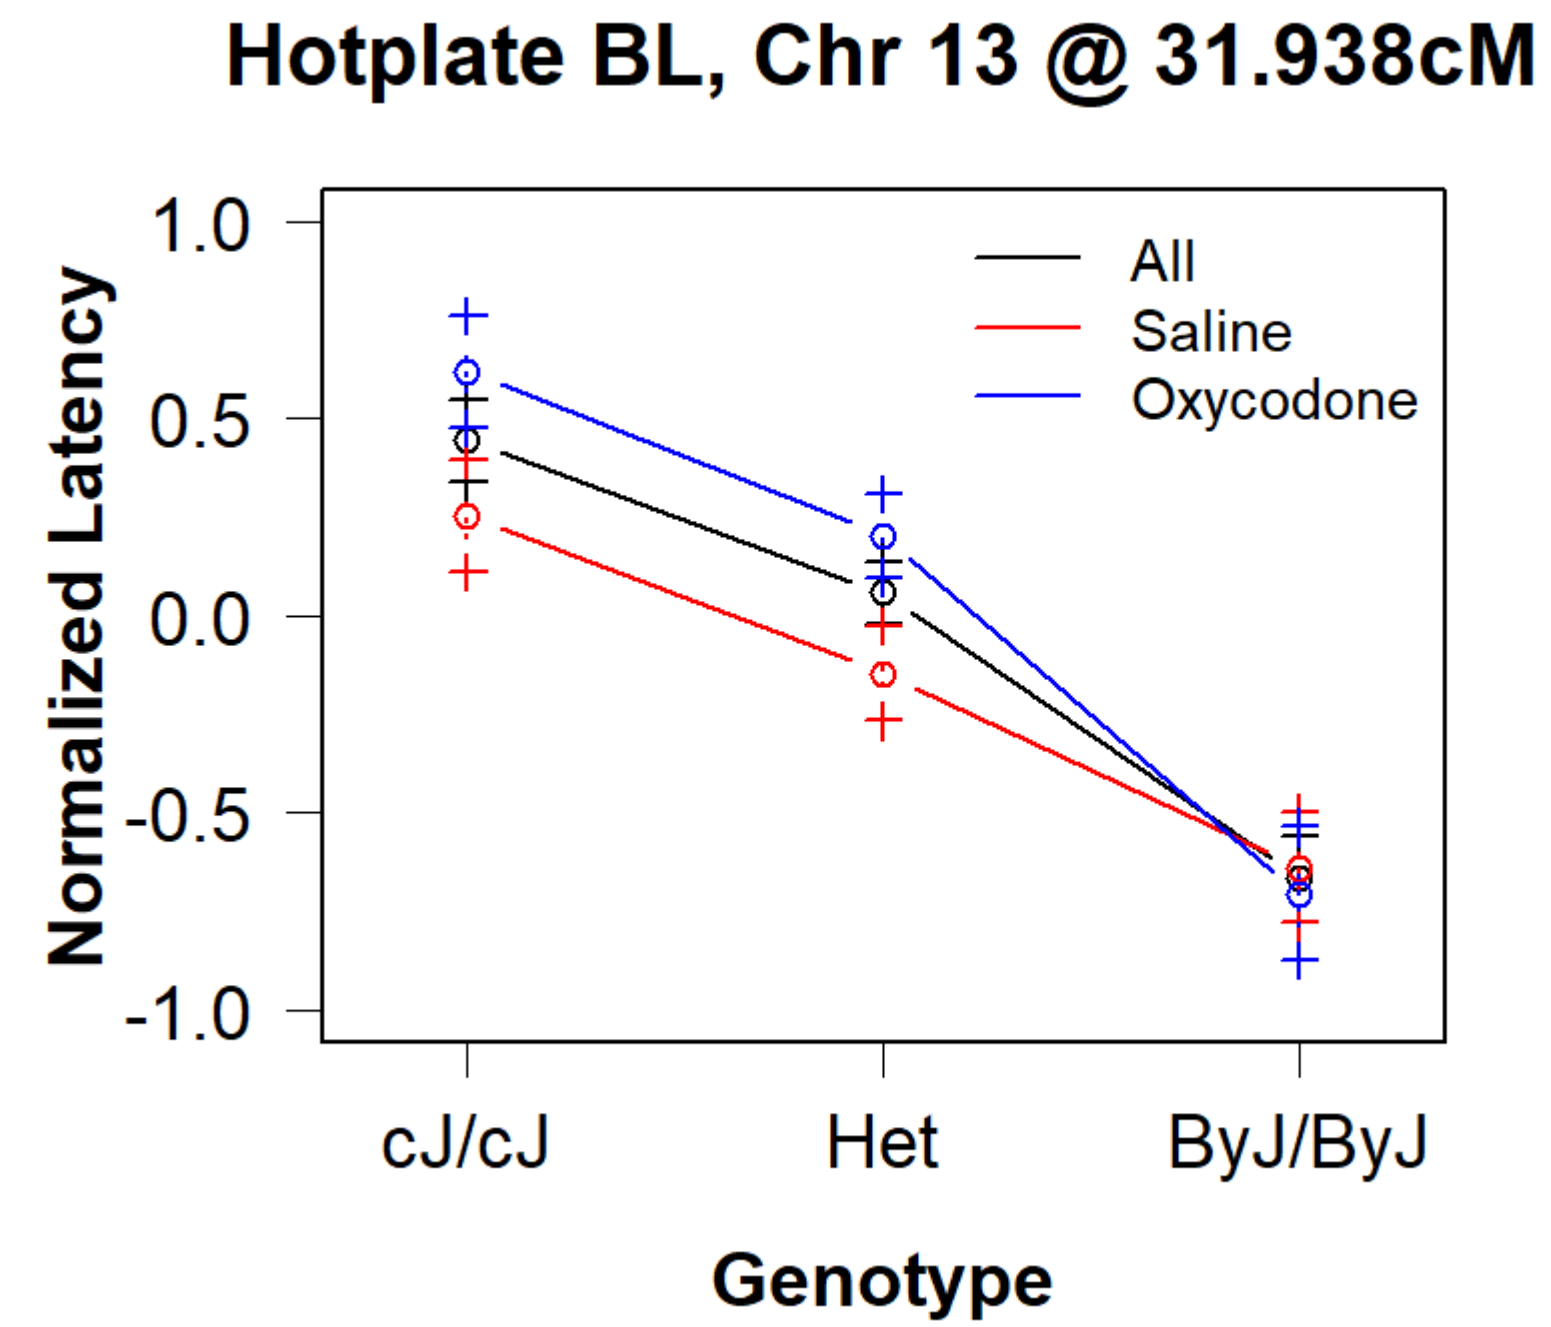

(C)

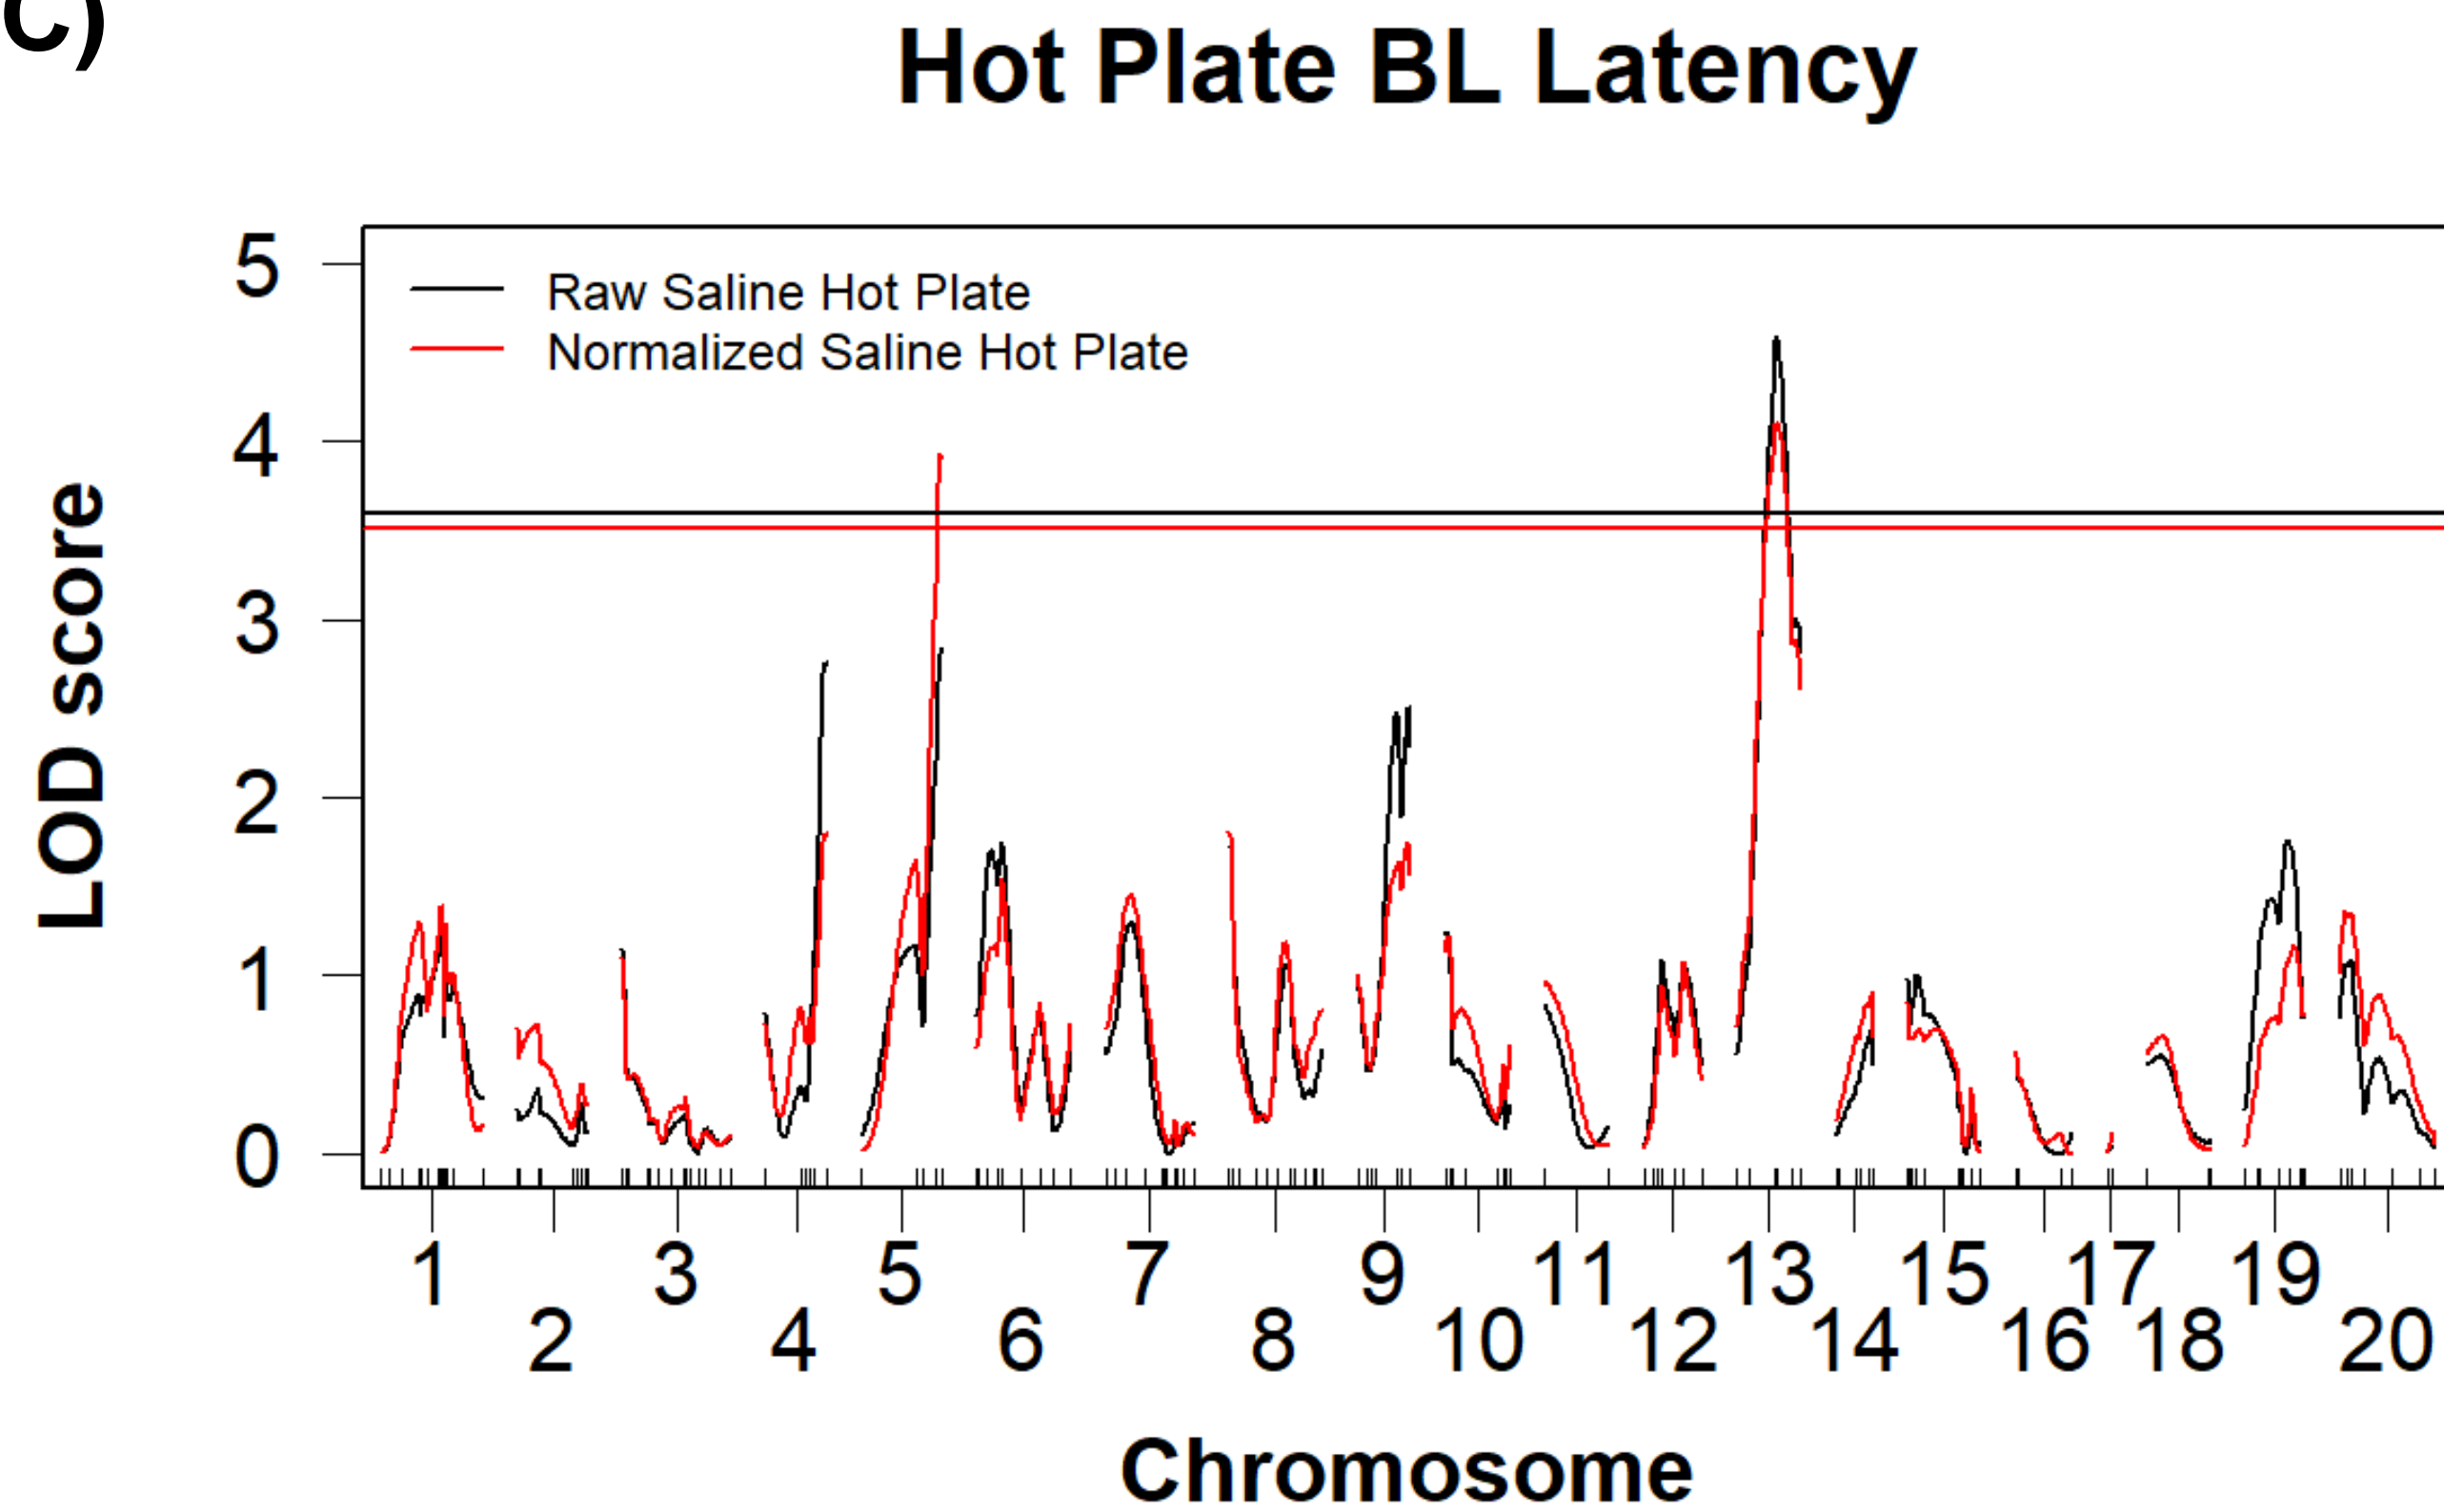

# Supplementary Figure 3: Saline-only QTLs for raw and normalized brain weights

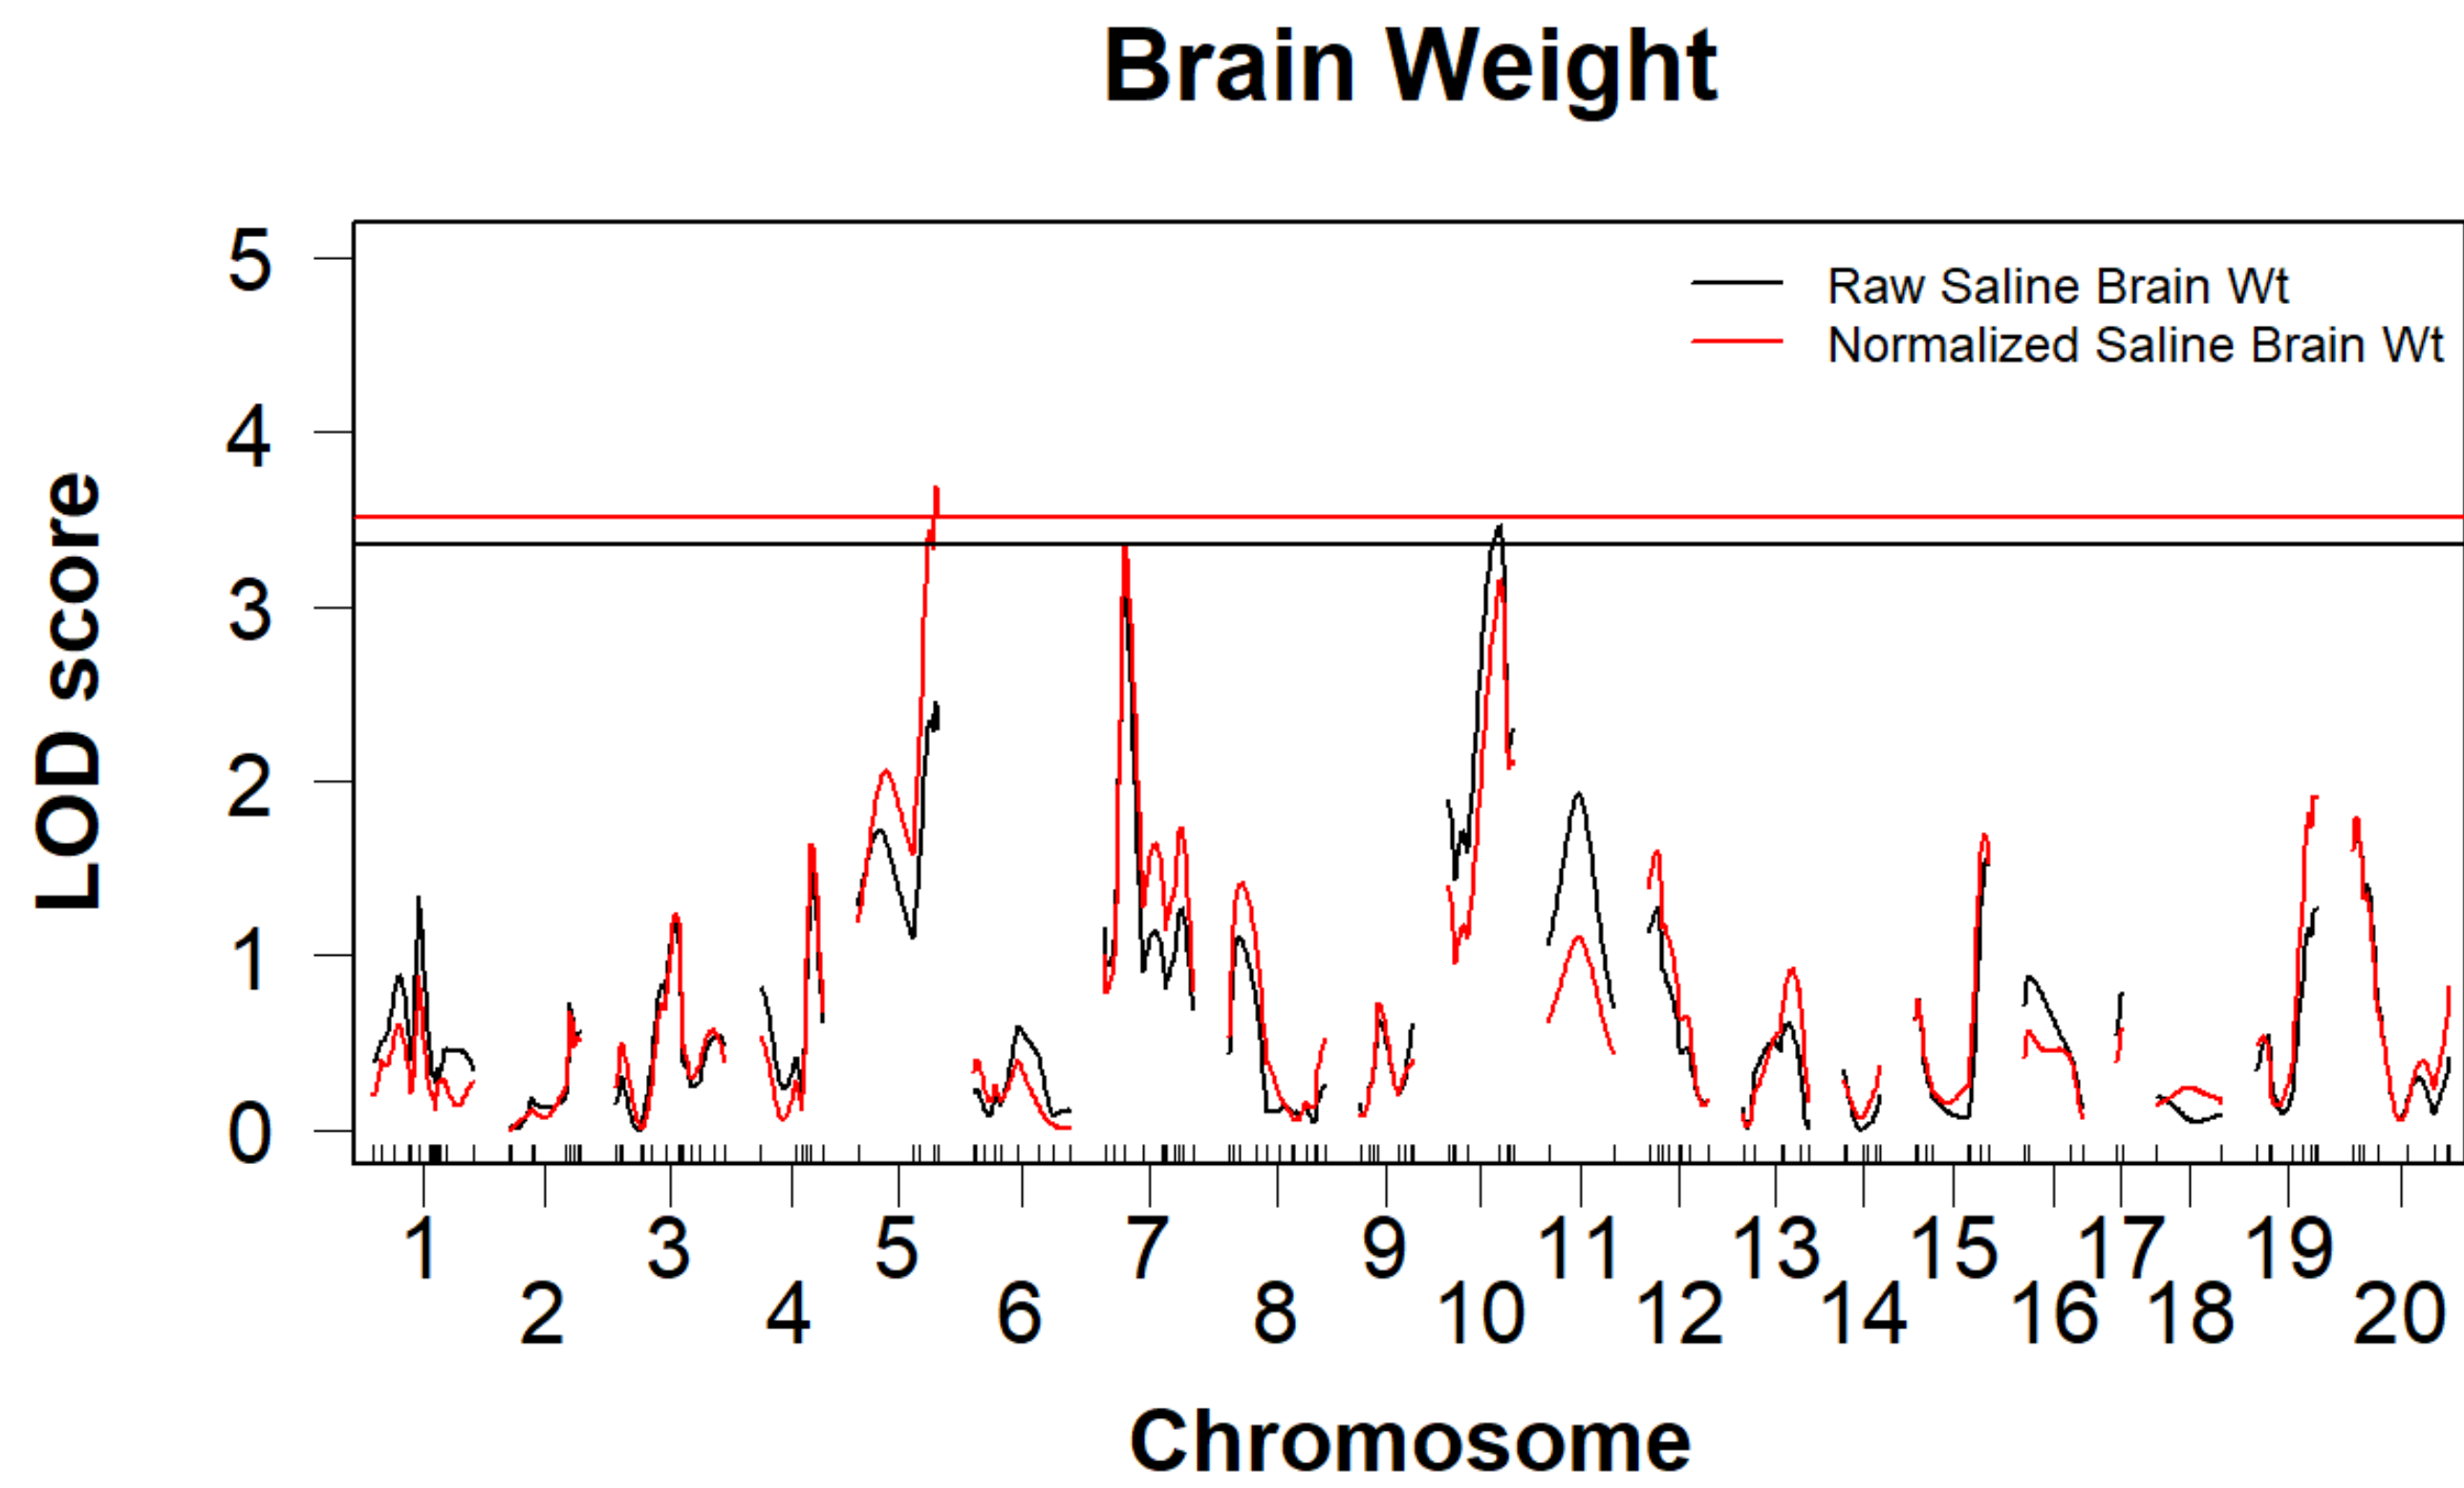

# Supplementary Figure 4: Spinal cord transcriptome analysis of differential expression in BALB/c substrains by sex

(A)

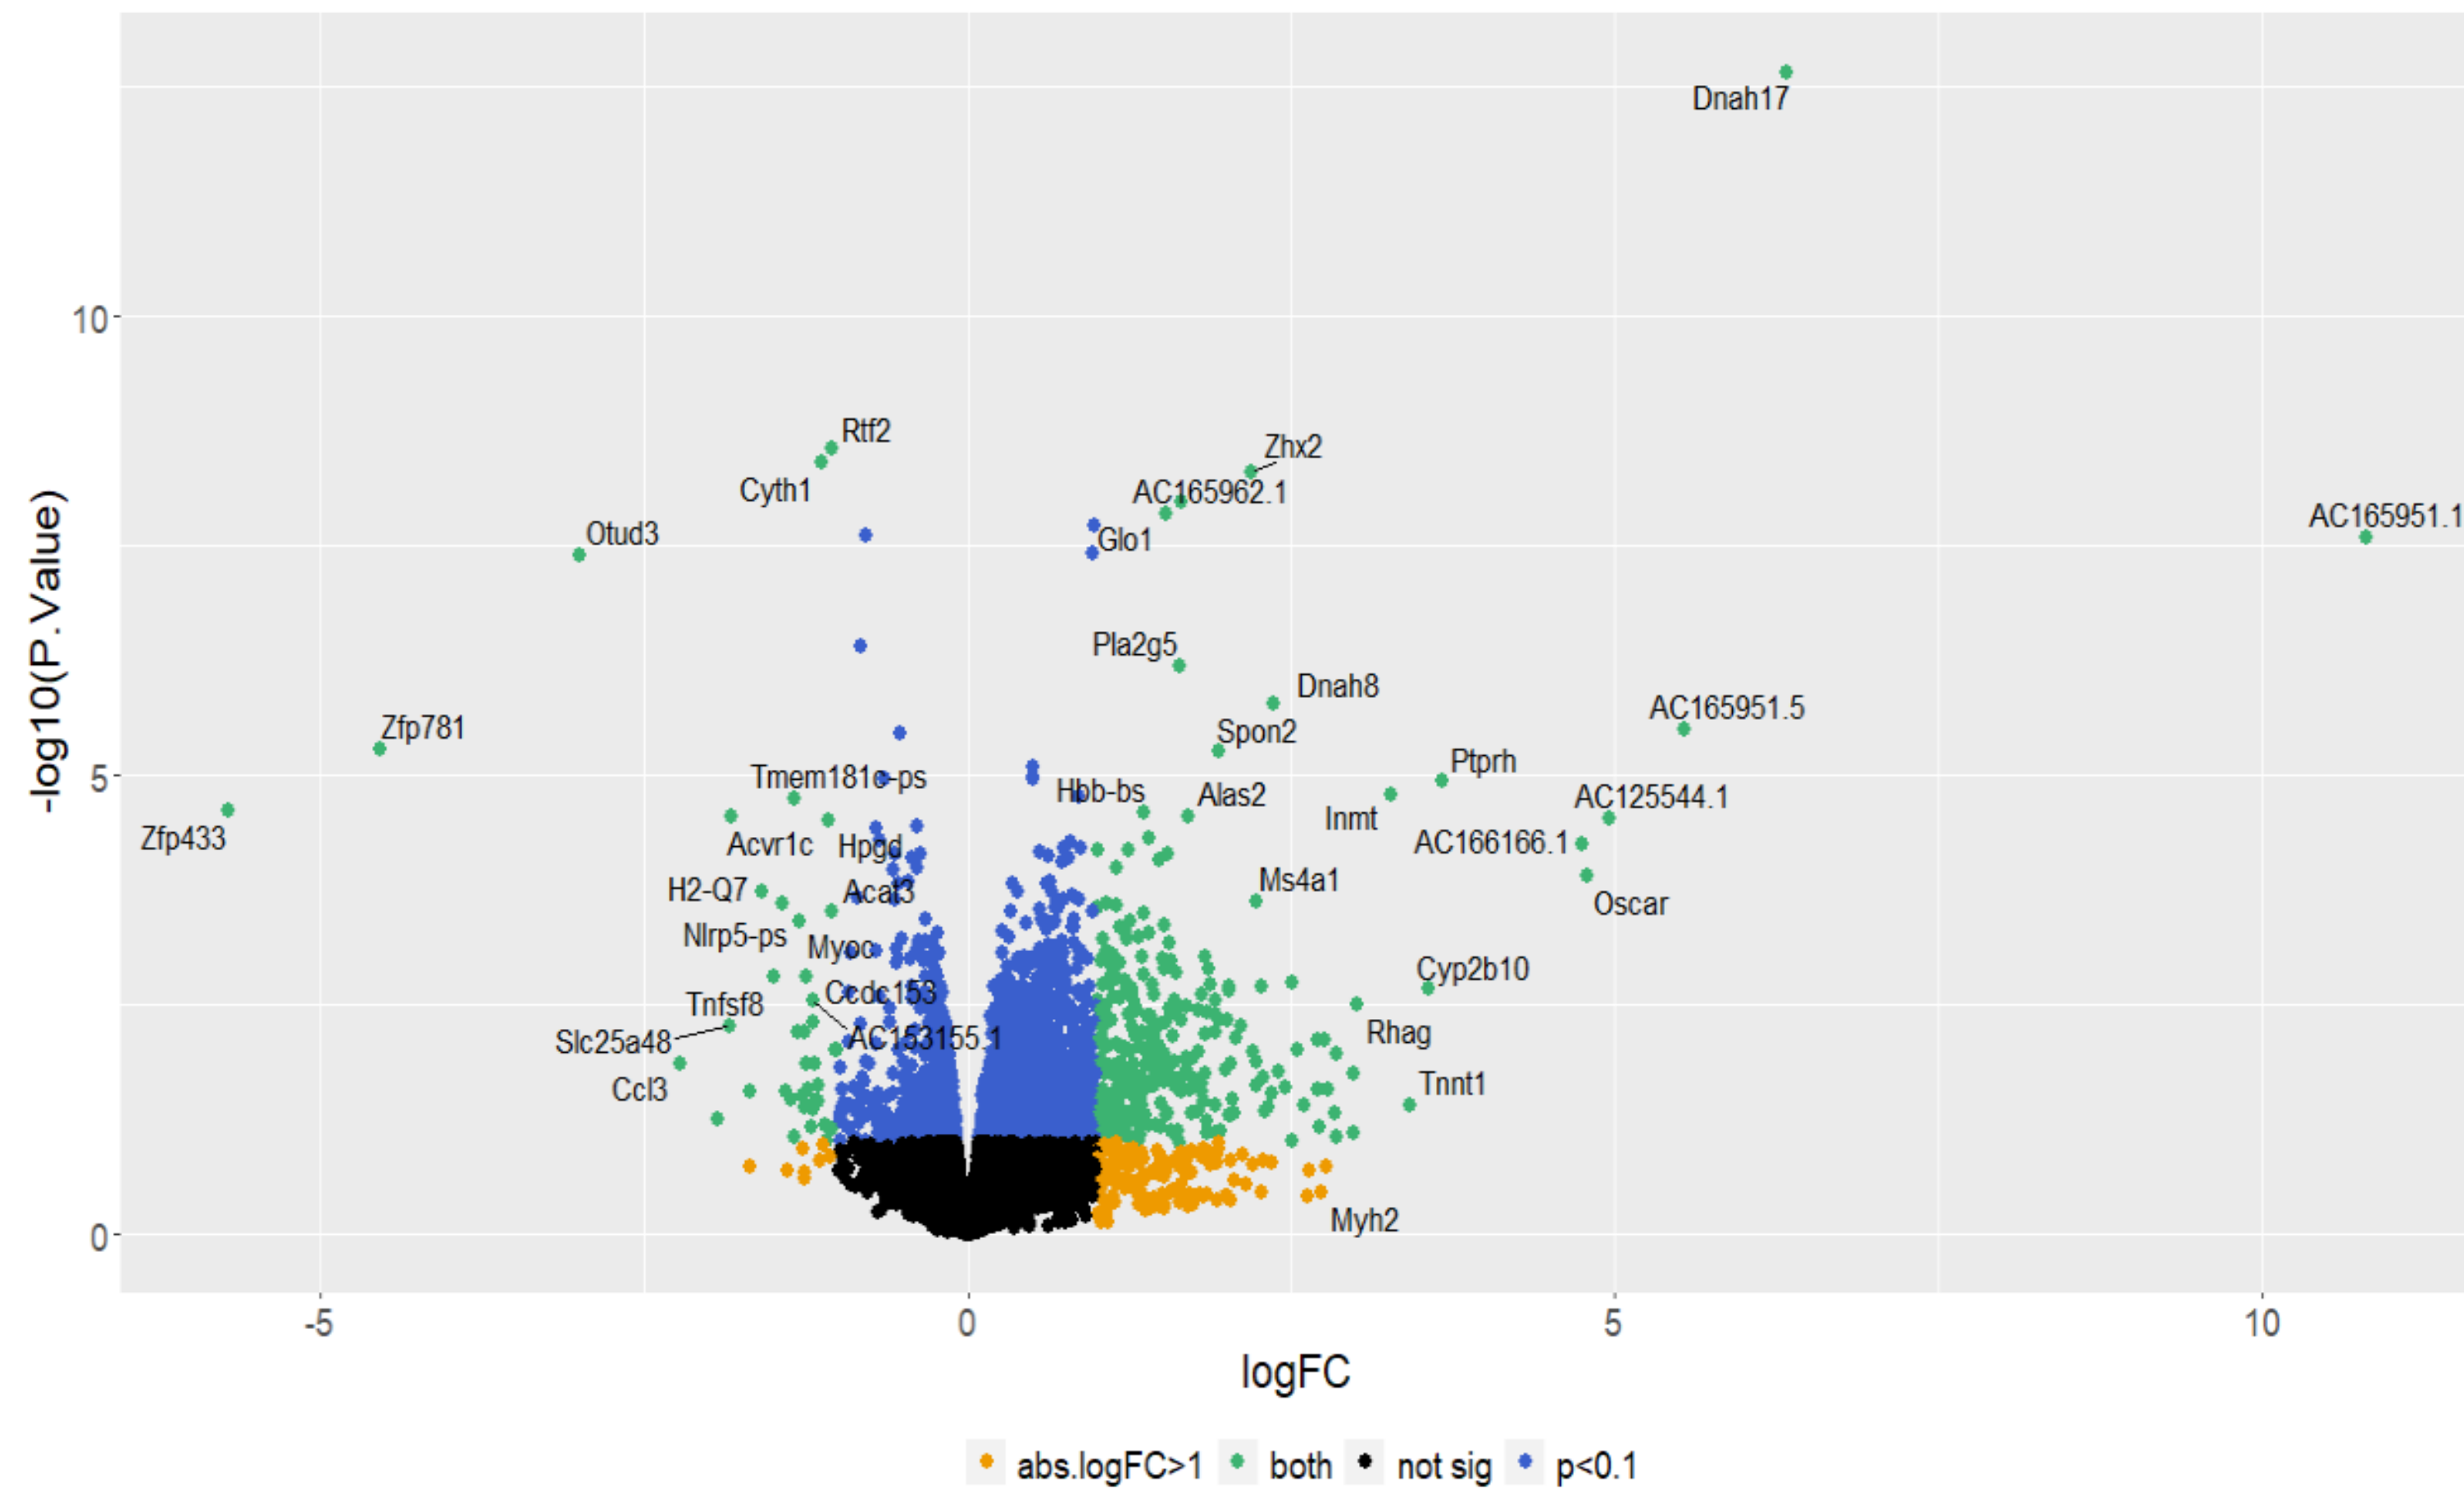

(B)

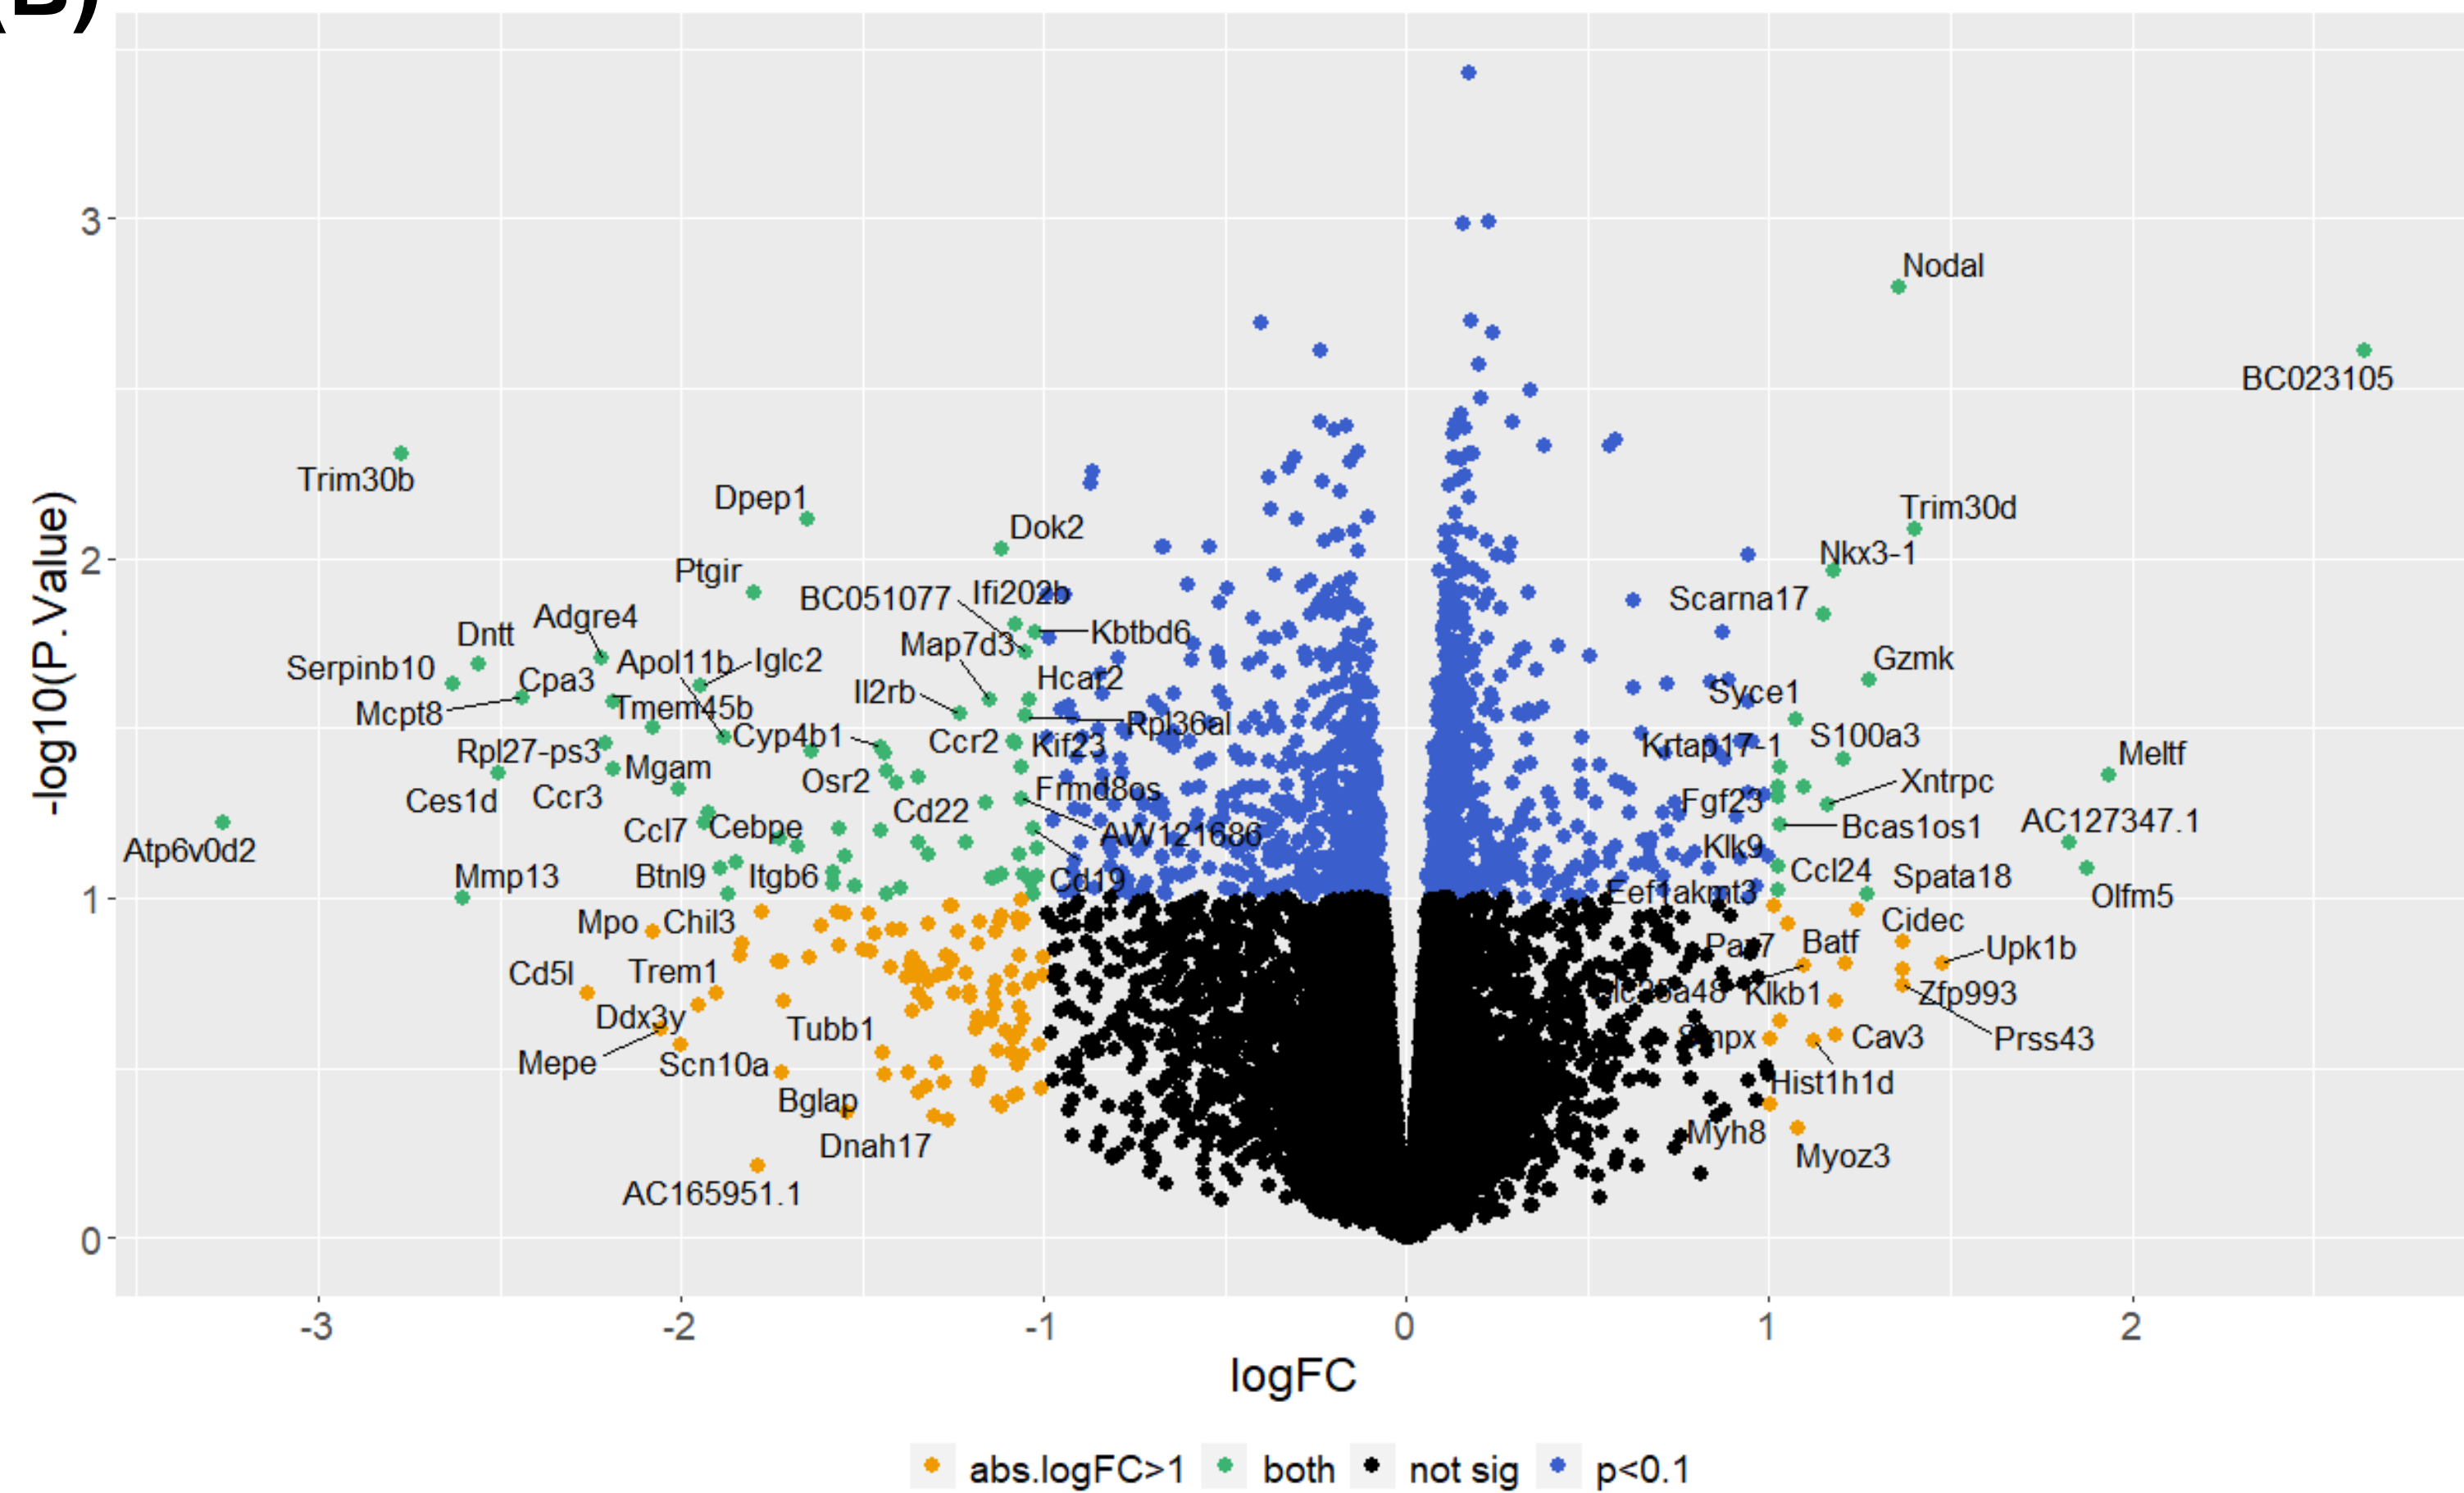

Supplement: sj-pdf-1-mpx-10.1177_17448069221079540.pdf [file sj-pdf-1-mpx-10.1177_17448069221079540.pdf]
